# Supplementary material
Source: PubMed Central journal article supplement (PMC5350071)
Supplement: NIHMS810358-supplement-01.pdf [file NIHMS810358-supplement-01.pdf]

**Supplementary Figure 1** Colonization of mice with SFB-monoassociated feces is sufficient to drive neutrophil recruitment into the ileum. (a) Representative FACS plots and associated (b) frequencies and numbers of neutrophils in the ileum of SFB-void Jax mice (Jax) following colonization with SFB<sup>+</sup>CC or SFB-monoassociated feces (SFB) for 7 days. Data are representative of four to six mice per group. All data are presented as mean  $\pm$  SEM; \* $p$ <0.05, \*\* $p$ <0.01, and \*\*\* $p$ <0.001, one-way ANOVA with Tukey test.

**Supplementary Figure 2** Neutrophils remain in the ileum for an extended period after initial colonization with SFB-containing microbiota. (a) Representative FACS plots and associated (b) frequencies and numbers of neutrophils in the ileum of SFB-void Jax mice colonized with SFB<sup>+</sup>CC for 7 or 14 days. Data are representative of six mice per group. All data are presented as mean  $\pm$  SEM; \* $p$ <0.05 and \*\*\* $p$ <0.001, one-way ANOVA with Tukey test.

**Supplementary Figure 3** Neutrophil depletion during colonization with SFB-containing microbiota results in increased levels of mucosa-associated SFB. SFB-void Jax mice were treated with either isotype control antibody or  $\alpha$ Ly6G antibody and colonized with SFB<sup>+</sup>CC for 7 days. Levels of total bacterial DNA (EUB) or SFB DNA in ileal tissue were examined via qPCR. Data are representative of four mice per group. All data are presented as mean  $\pm$  SEM; \*\* $p$ <0.01, Mann-Whitney test, two-tailed.

**Supplementary Figure 4** Rag-deficient mice exhibit impaired control of SFB expansion. Levels of total bacterial DNA (EUB) and SFB DNA were examined by qPCR in the feces of SFB-void Jax B6 and Jax *Rag1*<sup>-/-</sup> mice after colonization with SFB<sup>+</sup>CC for 7 days. Data are representative of two independent experiments of three to four mice per group. All data are presented as mean ± SEM; \*\*\**p*<0.001, Mann-Whitney test, two-tailed.

**Supplementary Figure 5** Neutrophil depletion during colonization with SFB-containing microbiota does not promote ileal inflammation. (a) Representative histology of hematoxylin and eosin-stained ileum sections and (b) associated inflammation scores from SFB-void Jax mice (Jax), and SFB-void Jax mice treated with isotype control antibody or αLy6G antibody and colonized with SFB<sup>+</sup>CC for 7 days. Data are representative of four to five mice per group. All data are presented as mean ± SEM; not significant, one-way ANOVA with Tukey's multiple comparison test.

**Supplementary Figure 6** IL-17A neutralization during colonization with SFB-containing microbiota results in augmented Th17 responses in the ileum. (a) Expression of IL-17A mRNA in the ileum of SFB-void Jax mice treated with isotype control antibody or αIL-17A antibody and colonized with SFB<sup>+</sup>CC for 7 days. Isolated cells from the ileum of these mice were restimulated with PMA and ionomycin and assessed for intracellular IL-17A. (b) Representative FACS plots as well as cell (c) frequency and number among the indicated groups are shown

for expression of IL-17A following restimulation with PMA and ionomycin (pre-gated on TCR $\beta$ <sup>+</sup>CD4<sup>+</sup> cells). Data are representative of two independent experiments with four mice per group. All data are presented as mean  $\pm$  SEM; \* $p$ <0.05 and \*\* $p$ <0.01, one-way ANOVA with Tukey's multiple comparison test.

**Supplementary Figure 7** Neutrophil depletion during colonization with with SFB-containing microbiota results in decreased expression of antimicrobial peptides. Expression of RegIII $\beta$ , RegIII $\gamma$ , and pan-defensin mRNA in ileal explants from SFB-void Jax mice (Jax), and SFB-void Jax mice treated with isotype control antibody or  $\alpha$ Ly6G antibody and colonized with SFB<sup>+</sup>CC for 7 days, and subsequently restimulated *in vitro* with rML-23 for 8 hours. Data are representative of two independent experiments with three to six mice per group. All data are presented as mean  $\pm$  SEM; \* $p$ <0.05 and \*\*\* $p$ <0.001, one-way ANOVA with Tukey's multiple comparison test.

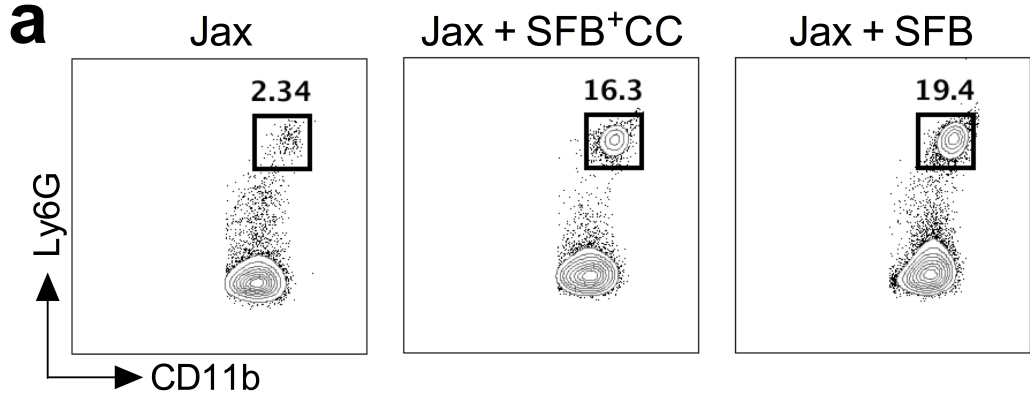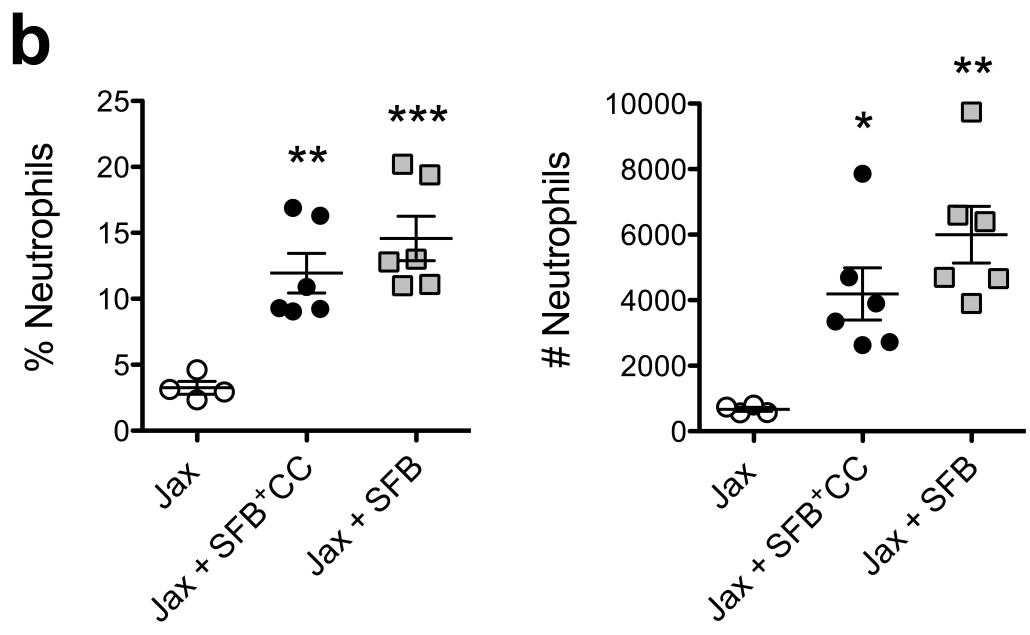

Supplementary Figure 1

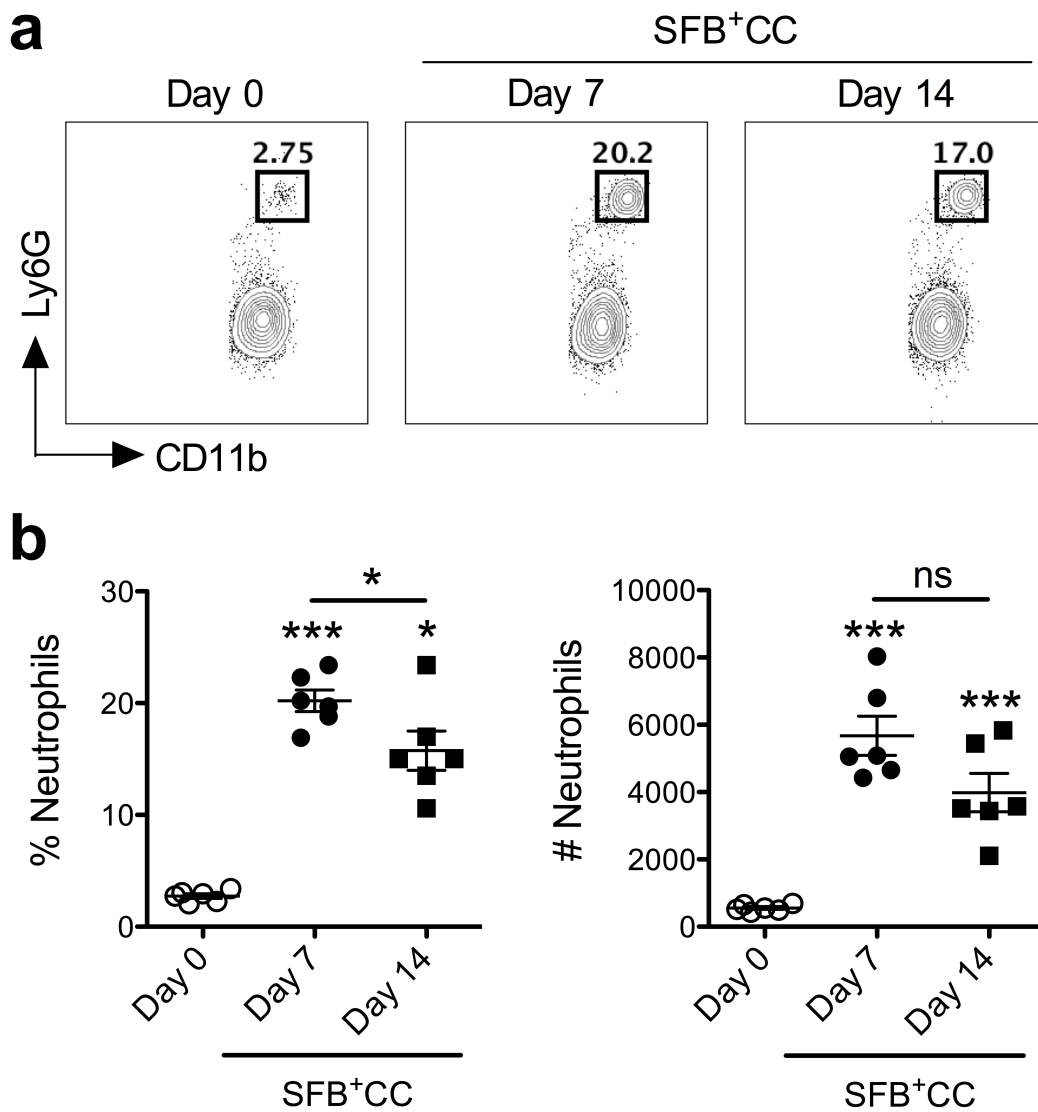

Supplementary Figure 2

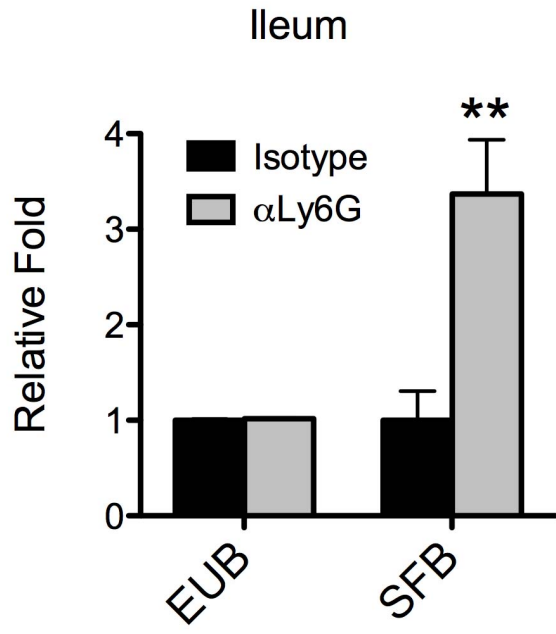

Supplementary Figure 3

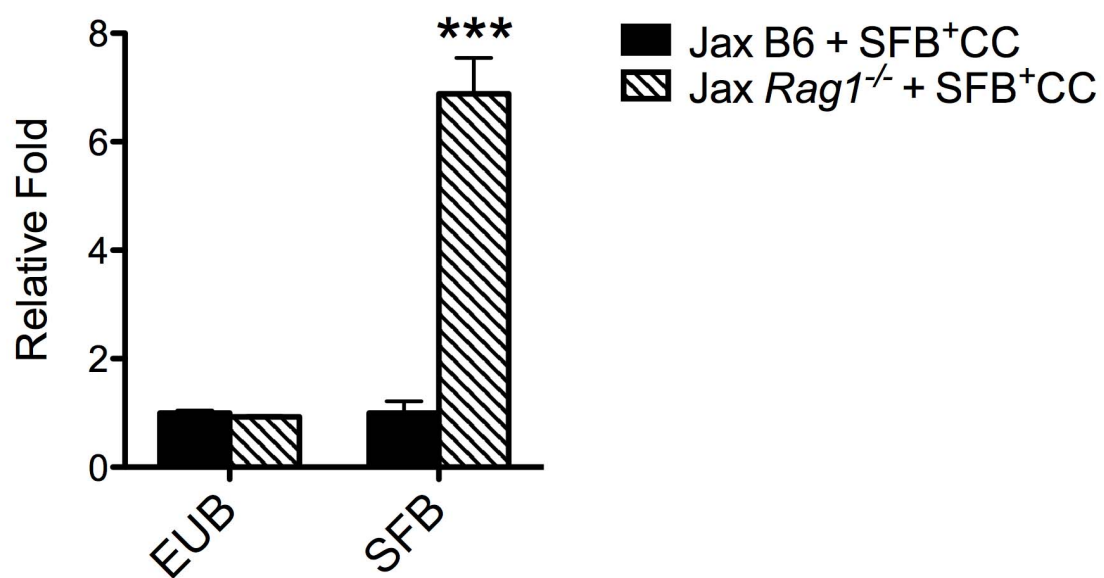

Supplementary Figure 4

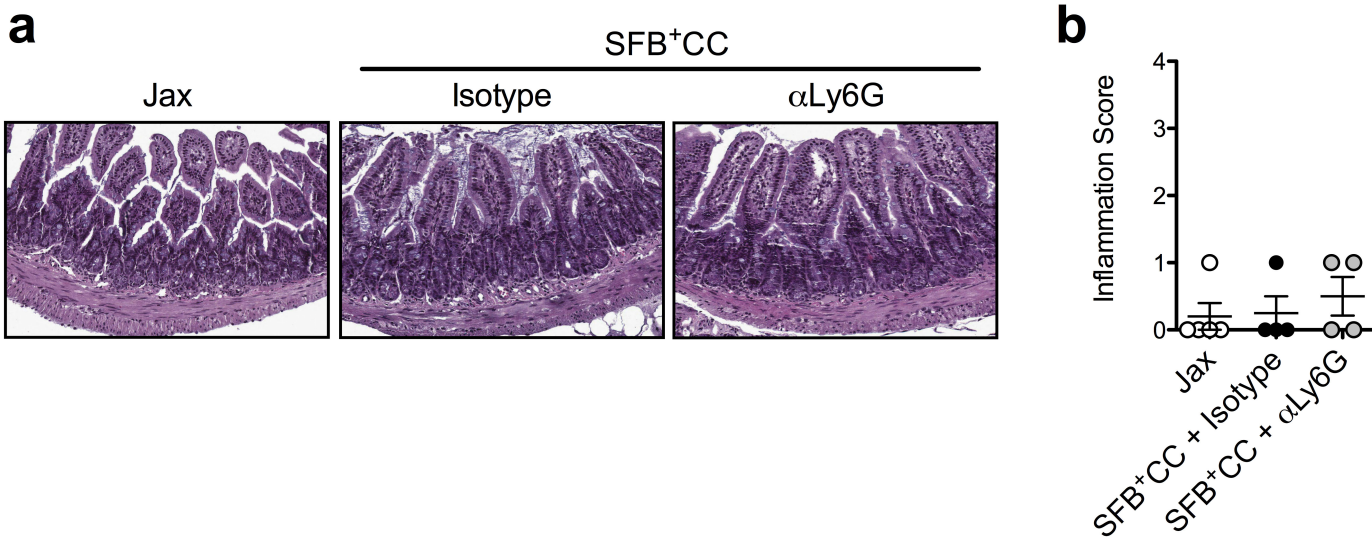

Supplementary Figure 5



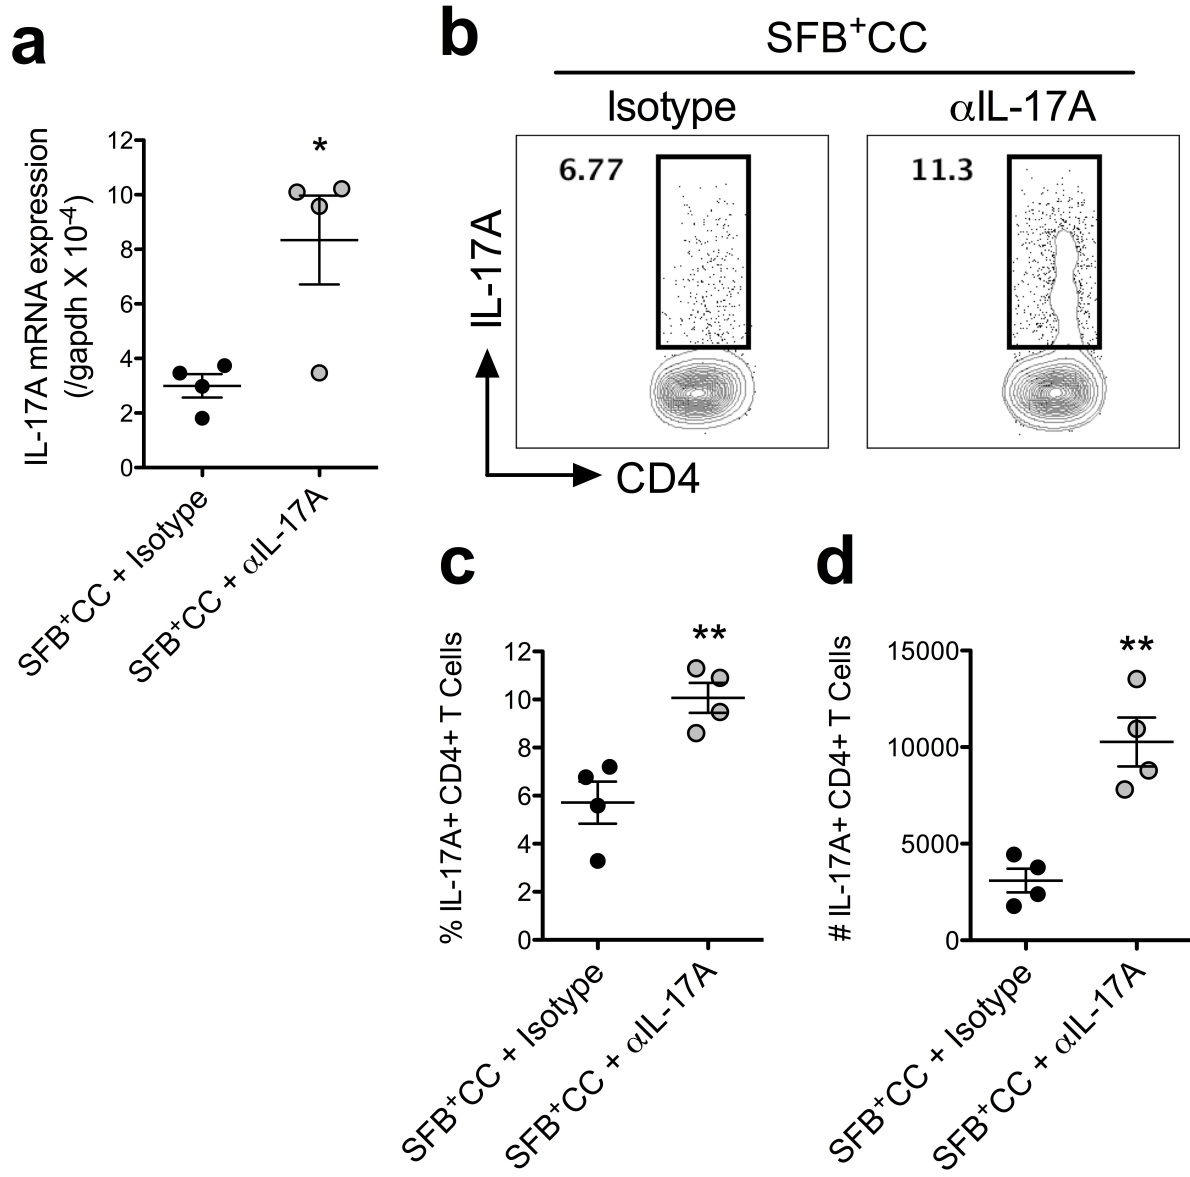

Supplementary Figure 6

**a**

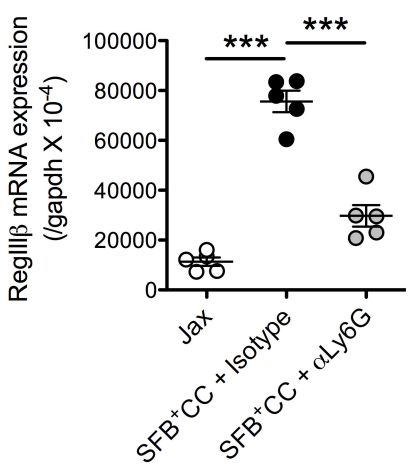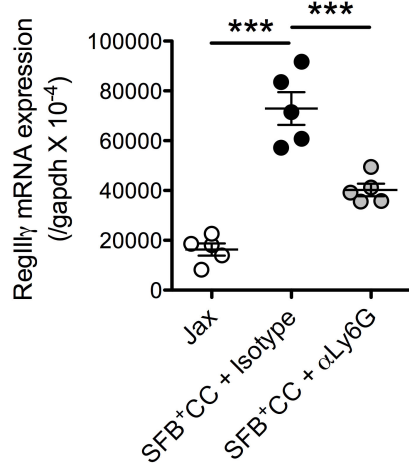

**b**

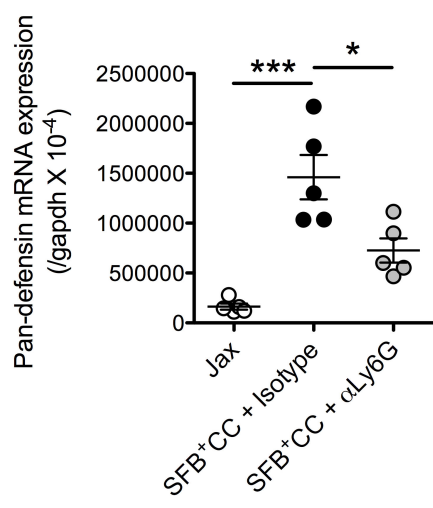

Supplementary Figure 7
